# Supplementary material for: Tunable clustering of magnetic nanoparticles in microgels: enhanced magnetic relaxivity by modulation of network architecture
Source: Royal Society of Chemistry journal article supplement (doi:10.1039/c7nr07539a), 2018-01-01
Supplement: c7nr07539a1.pdf [file c7nr07539a1.pdf]

## Supporting Information

Figure S1

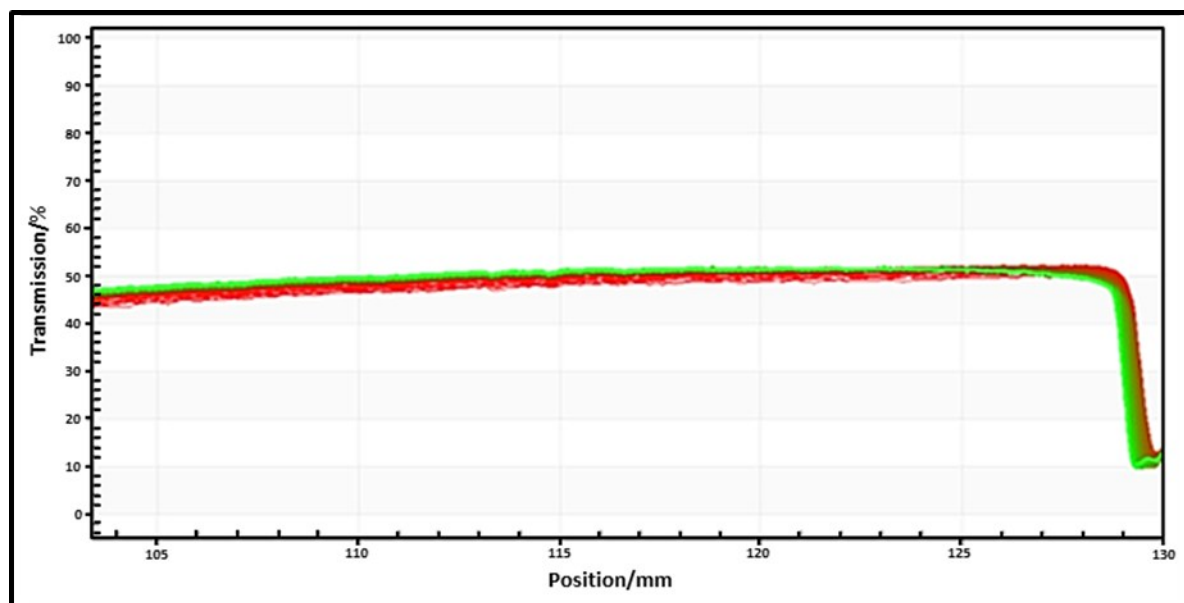

The dispersion stability analysis for the PVCL-GMA microgel with 2.5 mol% BIS is shown exemplary. The color coding stands for: red, the beginning of the experiment and green, for the end of the experiment. The difference in transmission after the experiment was only 7%, which implies that the particles were still stable in the solvent.

Figure S2

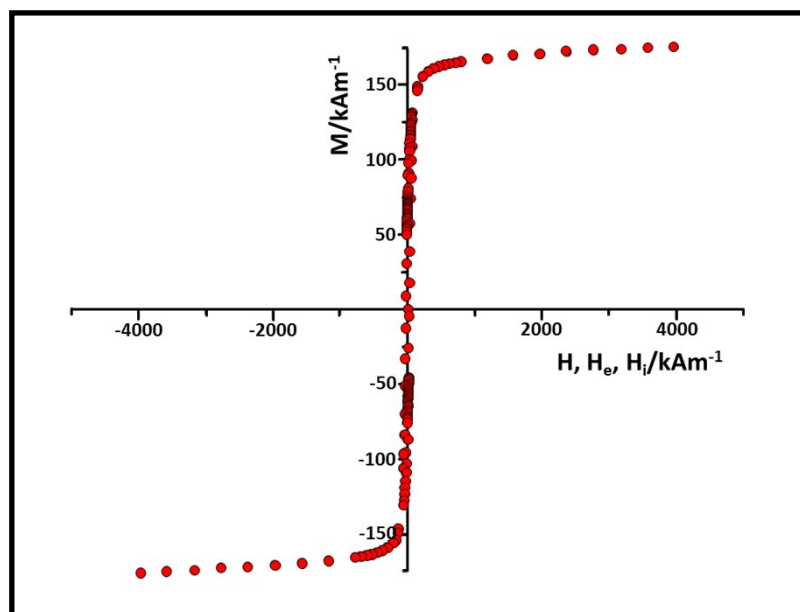

Hysteresis curve measured at 2 K for the oleic acid coated magnetite nanoparticles. The saturation magnetisation was found to be 32.06 emu/g.

Figure S3

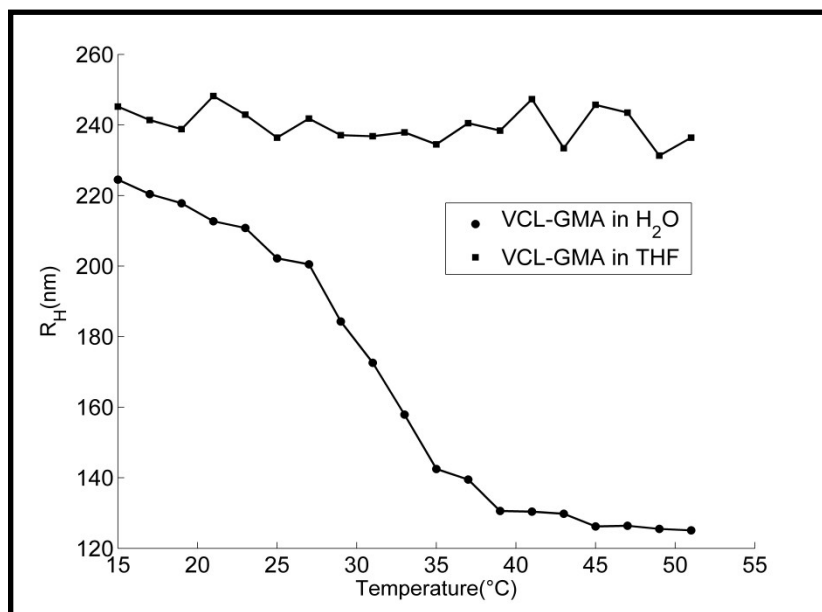

The temperature trends measured in water and THF with DLS for the PVCL-GMA microgel with 2.5 mol% BIS are shown. The data points shown here are averaged over 3 consecutive experiments.

Figure S4

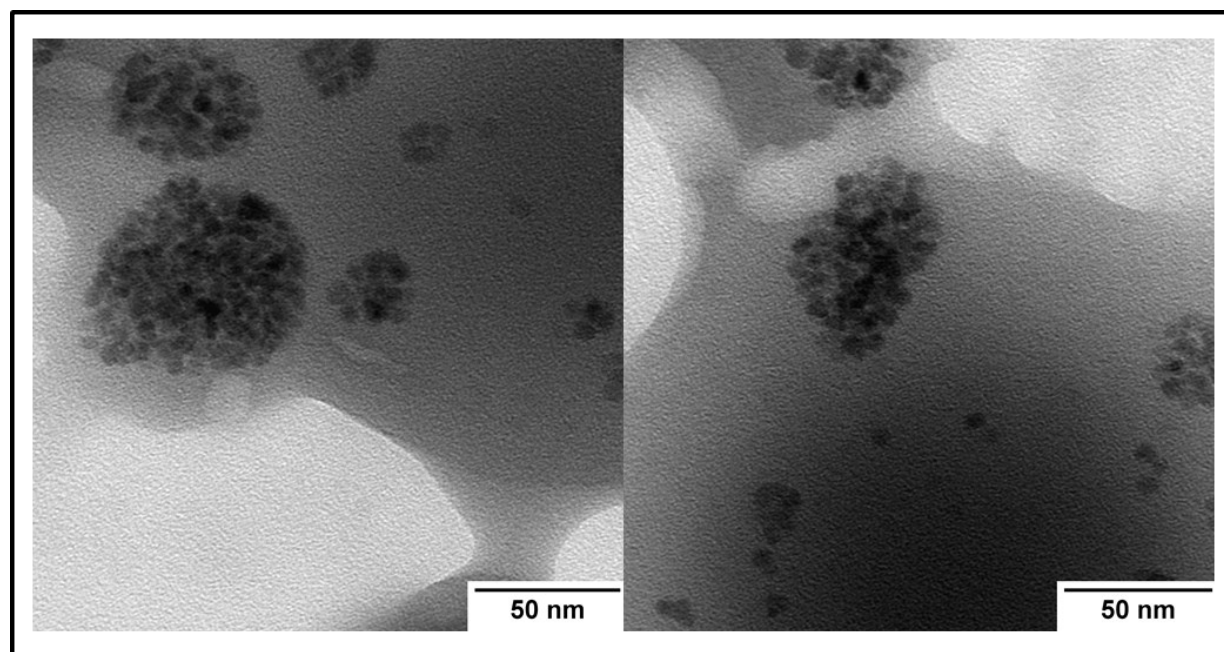

Close-up on a magnetite nanoparticle cluster inside a VCL-GMA microgel with 4.5 mol% BIS and 10 wt% loading degree.

Figure S5

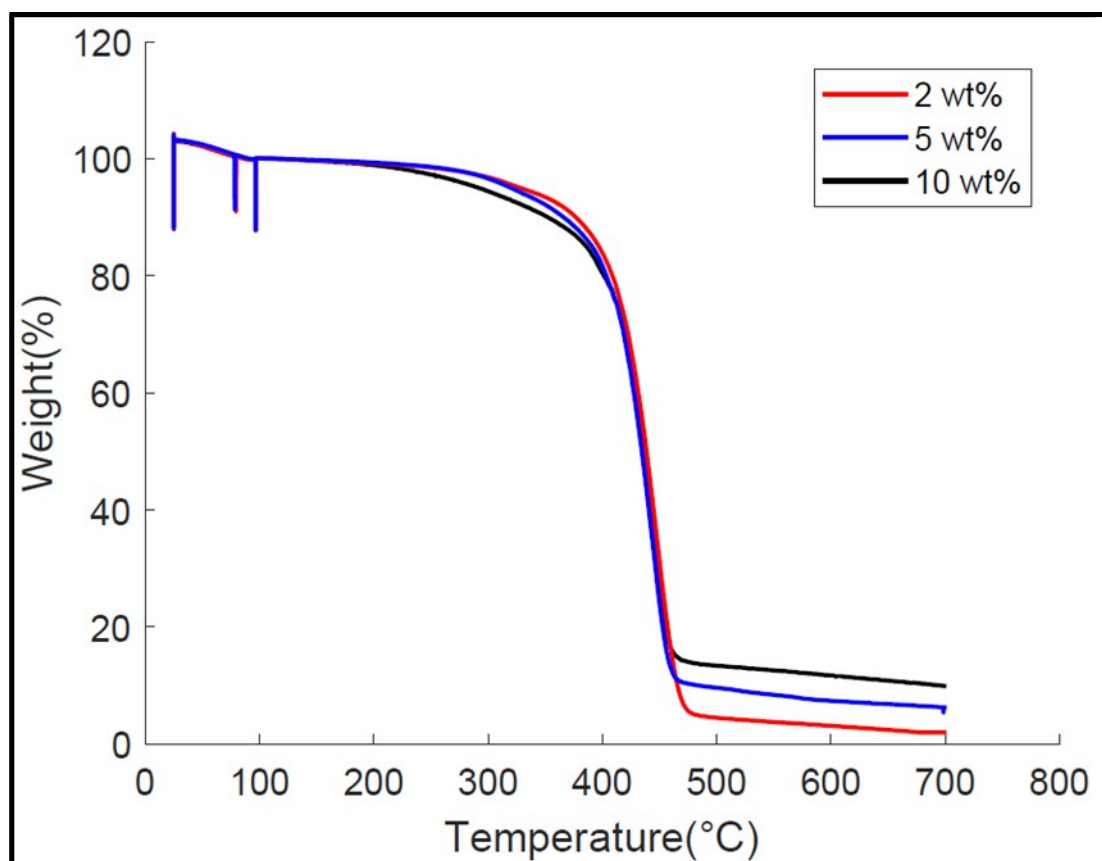

TGA measurements of the microgels with 2.5 mol% BIS and theoretical nanoparticle loading degree of 2, 5 and 10 wt%. The experimentally found values are shown in the table below.

| Crosslink concentration /mmol | Theoretical Loading degree /wt% | TGA residual mass at 700 °C (wt%) |
|-------------------------------|---------------------------------|-----------------------------------|
| 1                             | 2                               | 2.13                              |
|                               | 5                               | 5.43                              |
|                               | 10                              | 10.88                             |
| 2.5                           | 2                               | 2.00                              |
|                               | 5                               | 5.98                              |
|                               | 10                              | 11.07                             |
| 4.5                           | 2                               | 2.67                              |
|                               | 5                               | 5.86                              |
|                               | 10                              | 11.23                             |
